# Supplementary material for: Structural variants linked to Alzheimer’s Disease and other common age-related clinical and neuropathologic traits
Source: PubMed Central journal article supplement — medRxiv. 2024 Aug 13:2024.08.12.24311887. Preprint. [Version 1] doi: 10.1101/2024.08.12.24311887 (PMC11343262; doi:10.1101/2024.08.12.24311887), 2024-08-13
Supplement: media-1.pdf [file media-1.pdf]

## SUPPLEMENTARY MATERIAL

### **Structural variants linked to Alzheimer's Disease and other common age-related clinical and neuropathologic traits**

Ricardo A Vialle<sup>1</sup>, Katia de Paiva Lopes<sup>1</sup>, Yan Li<sup>1</sup>, Bernard Ng<sup>1</sup>, Julie A Schneider<sup>1</sup>, Aron S Buchman<sup>1</sup>, Yanling Wang<sup>1</sup>, Jose M Farfel<sup>1</sup>, Lisa L Barnes<sup>1</sup>, Aliza P Wingo<sup>2,3</sup>, Thomas S Wingo<sup>4</sup>, Nicholas T Seyfried<sup>5</sup>, Philip L De Jager<sup>6</sup>, Chris Gaiteri<sup>1,7</sup>, Shinya Tasaki<sup>1</sup>, David A Bennett<sup>1</sup>

<sup>1</sup> Rush Alzheimer's Disease Center, Rush University Medical Center, Chicago, IL, USA

<sup>2</sup> Department of Psychiatry, University of California, Davis CA, USA

<sup>3</sup> VA Northern California Health Care System, McClellan Park, CA, USA

<sup>4</sup> Department of Neurology, University of California, Davis, CA, USA

<sup>5</sup> Goizueta Alzheimer's Disease Research Center, Department of Neurology and Department of Biochemistry, Emory University School of Medicine, Atlanta, Georgia, USA

<sup>6</sup> Department of Neurology, College of Physicians and Surgeons, Columbia University and the New York Presbyterian Hospital, New York, NY, USA

<sup>7</sup> Department of Psychiatry, SUNY Upstate Medical University, Syracuse, NY, USA

---

**Supplementary Table 1. Demographic and clinical characteristics of study cohorts**

|                                                 | ROS              | MAP              | ROS/MAP          |
|-------------------------------------------------|------------------|------------------|------------------|
| <i>n</i>                                        | 529              | 559              | 1088             |
| Age baseline, mean (SD), y                      | 78.2 (6.8)       | 83.4 (5.8)       | 80.9 (6.8)       |
| Age at death, mean (SD), y                      | 88.1 (6.8)       | 89.8 (6.0)       | 89.0 (6.4)       |
| Male sex, No. (%)                               | 188 (35.5)       | 180 (32.2)       | 368 (33.8)       |
| Educational level, mean (SD), y                 | 18.1 (3.3)       | 14.6 (2.9)       | 16.3 (3.6)       |
| Length of follow-up, mean (SD), y               | 9.1 (5.4)        | 5.5 (3.7)        | 7.2 (4.9)        |
| MMSE score, median (IQR) - at baseline          | 29 (27.0-30.0)   | 28 (26.0-29.0)   | 28 (26.0-29.0)   |
| MMSE score, median (IQR) - at death             | 24 (14.4-28.0)   | 25 (17.0-28.0)   | 25 (15.0-28.0)   |
| Global cognition score, mean (SD) - at baseline | -0.04 (0.63)     | -0.24 (0.76)     | -0.14 (0.70)     |
| Global cognition score, mean (SD) - at death    | -1.00 (1.29)     | -0.96 (1.16)     | -0.98 (1.23)     |
| MCI, No. (%)                                    | 121 (22.9)       | 154 (27.5)       | 275 (25.3)       |
| Dementia, No. (%)                               | 253 (47.8)       | 222 (39.7)       | 475 (43.7)       |
| NIA-Reagan AD, No. (%) <sup>a</sup>             | 329 (62.2)       | 361 (64.6)       | 690 (63.4)       |
| Global AD pathologic score, median (IQR)        | 0.67 (0.18-1.18) | 0.65 (0.19-1.20) | 0.67 (0.19-1.20) |
| Neuritic plaques score, median (IQR)            | 0.69 (0.03-1.31) | 0.71 (0.06-1.35) | 0.71 (0.05-1.34) |
| Diffuse plaques score, median (IQR)             | 0.66 (0.11-1.31) | 0.54 (0.07-1.11) | 0.60 (0.08-1.19) |
| Neurofibrillary tangles score, median (IQR)     | 0.38 (0.13-0.84) | 0.39 (0.15-0.93) | 0.39 (0.14-0.89) |
| Macroscopic infarcts, No. (%)                   | 188 (35.5)       | 202 (36.1)       | 390 (35.8)       |
| Microinfarcts, No. (%)                          | 145 (27.4)       | 162 (29.0)       | 307 (28.2)       |
| Neocortical Lewy bodies, No. (%)                | 66 (12.9)        | 70 (13.0)        | 136 (12.9)       |
| TDP-43, No. (%) <sup>b</sup>                    | 155 (33.6)       | 187 (34.8)       | 342 (34.3)       |
| Hippocampal sclerosis, No. (%)                  | 39 (7.5)         | 53 (9.5)         | 92 (8.5)         |
| Amyloid angiopathy, No. (%) <sup>c</sup>        | 183 (36.3)       | 190 (34.2)       | 373 (35.2)       |
| Atherosclerosis, No. (%) <sup>c</sup>           | 204 (39.0)       | 188 (33.7)       | 392 (36.3)       |
| Arteriolosclerosis, No. (%) <sup>c</sup>        | 161 (30.8)       | 212 (38.0)       | 373 (34.5)       |

Abbreviations: AD, Alzheimer's disease; IQR, interquartile range; MCI, mild cognitive impairment; MMSE, Mini-Mental State Examination; NIA, National Institute on Aging; TDP-43, transactive response DNA-binding protein 43.

<sup>a</sup> Intermediate or high likelihood.

<sup>b</sup> Inclusion beyond the amygdala.

<sup>c</sup> Moderate or severe.

**Supplementary Table 2. Variables and categories of each phenotype tested**

| <b>variable</b>       | <b>family</b> | <b>category</b>    | <b>description</b>           |
|-----------------------|---------------|--------------------|------------------------------|
| cogn_global_lv        | Continuous    | Cognition          | Global cognitive function    |
| cogng_demog_slope     | Continuous    | Cognition          | Cognitive decline            |
| cogng_path_slope      | Continuous    | Cognition          | Cognitive resilience         |
| tangles_sqrt          | Continuous    | Pathology          | Tangle density               |
| nft_sqrt              | Continuous    | Pathology          | Neurofibrillary tangle       |
| amyloid_sqrt          | Continuous    | Pathology          | Beta-Amyloid                 |
| plaq_n_sqrt           | Continuous    | Pathology          | Neuritic plaques             |
| plaq_d_sqrt           | Continuous    | Pathology          | Diffuse plaques              |
| tdp_43_binary         | Binary        | Pathology          | TDP-43                       |
| ci_num2_gct           | Binary        | Vascular Pathology | Cerebral Infarctions (Gross) |
| ci_num2_mct           | Binary        | Vascular Pathology | Cerebral Infarctions (Micro) |
| arteriol_scler        | Continuous    | Vascular Pathology | Arteriolosclerosis           |
| caa_4gp               | Continuous    | Vascular Pathology | Cerebral amyloid angiopathy  |
| cvda_4gp2             | Continuous    | Vascular Pathology | Cerebral Atherosclerosis     |
| ad_dementia_status    | Binary        | Cognition          | Alzheimer's Dementia         |
| cog_impairment_status | Binary        | Cognition          | Mild cognitive impairment    |
| ad_reagan             | Binary        | Pathology          | NIA-Reagan diagnosis of AD   |
| gpath                 | Continuous    | Pathology          | Global AD pathology          |
| parksc_lv             | Continuous    | Motor              | Global parkinsonian score    |
| dlbany                | Binary        | Pathology          | Lewy Body disease            |
| r_depres_status       | Binary        | Depression         | Major Depressive Disorder    |
| cesdsum_lv            | Continuous    | Depression         | Depressive symptoms (CES-D)  |
| frailty_z_lv          | Continuous    | Motor              | Frailty                      |
| motor10_lv            | Continuous    | Motor              | Motor functions              |

**Supplementary Table 3. AD GWAS loci in LD with SVs associated with ADRD traits ( $P < 0.05$ )**

| <b>AD GWAS locus</b>                  | <b>SV id</b> | <b>SV info</b>                                 | <b>SV LD with lead SNP (R2)</b> | <b>Best phenotype associated with SV</b> | <b>P-value of SV-phenotype association</b> |
|---------------------------------------|--------------|------------------------------------------------|---------------------------------|------------------------------------------|--------------------------------------------|
| chr6:32075406-33083813<br>(HLA-DRB5-) | DEL_25745    | DEL chr6:32512662<br>(len:-405 maf:0.310688)   | 0.91                            | Tangle density                           | 3.74E-02                                   |
| chr6:32075406-33083813<br>(HLA-DRB5-) | DEL_25747    | DEL chr6:32514898<br>(len:-1399 maf:0.312047)  | 0.91                            | Tangle density                           | 3.04E-02                                   |
| chr6:32075406-33083813<br>(HLA-DRB5-) | DEL_25752    | DEL chr6:32523647<br>(len:-6180 maf:0.468661)  | 0.59                            | Major Depressive Disorder                | 7.16E-02                                   |
| chr6:32075406-33083813<br>(HLA-DRB5-) | DEL_25737    | DEL chr6:32492661<br>(len:-60144 maf:0.449367) | 0.55                            | Major Depressive Disorder                | 3.64E-02                                   |
| chr6:32075406-33083813<br>(HLA-DRB5-) | DEL_25768    | DEL chr6:32624892<br>(len:-950 maf:0.433544)   | 0.52                            | Cognitive decline                        | 6.77E-02                                   |
| chr6:32075406-33083813<br>(HLA-DRB5-) | DEL_25739    | DEL chr6:32494986<br>(len:-336 maf:0.32361)    | 0.51                            | Cognitive decline                        | 5.16E-02                                   |
| chr6:32075406-33083813<br>(HLA-DRB5-) | DEL_25758    | DEL chr6:32561955<br>(len:-2671 maf:0.175407)  | 0.51                            | Tangle density                           | 6.39E-02                                   |
| chr6:32075406-33083813<br>(HLA-DRB5-) | DEL_25759    | DEL chr6:32571348<br>(len:-319 maf:0.44349)    | 0.50                            | Major Depressive Disorder                | 3.19E-02                                   |
| chr6:32075406-33083813<br>(HLA-DRB5-) | DUP_4026     | DUP chr6:32490722<br>(len:35810 maf:0.424051)  | 0.40                            | Tangle density                           | 1.01E-02                                   |
| chr6:32075406-33083813<br>(HLA-DRB5-) | DUP_4027     | DUP chr6:32494883<br>(len:43223 maf:0.429928)  | 0.39                            | Major Depressive Disorder                | 3.28E-03                                   |
| chr6:32075406-33083813<br>(HLA-DRB5-) | DEL_25746    | DEL chr6:32514825<br>(len:-26282 maf:0.19575)  | 0.35                            | Major Depressive Disorder                | 2.44E-02                                   |
| chr6:32075406-33083813<br>(HLA-DRB5-) | ALU_3734     | ALU chr6:32589834<br>(len:281 maf:0.116637)    | 0.35                            | Major Depressive Disorder                | 1.24E-01                                   |
| chr6:32075406-33083813<br>(HLA-DRB5-) | DEL_25761    | DEL chr6:32592405<br>(len:-127 maf:0.214932)   | 0.35                            | Tangle density                           | 2.65E-02                                   |
| chr6:32075406-33083813<br>(HLA-DRB5-) | DEL_25765    | DEL chr6:32622513<br>(len:-337 maf:0.438065)   | 0.32                            | Cerebral Infarctions (Micro)             | 4.03E-02                                   |
| chr6:32075406-33083813<br>(HLA-DRB5-) | DEL_25763    | DEL chr6:32614951<br>(len:-401 maf:0.438065)   | 0.32                            | Major Depressive Disorder                | 1.14E-02                                   |
| chr6:32075406-33083813<br>(HLA-DRB5-) | DEL_25767    | DEL chr6:32623524<br>(len:-1077 maf:0.426763)  | 0.31                            | Cognitive resilience                     | 4.49E-02                                   |
| chr6:32075406-33083813<br>(HLA-DRB5-) | SVA_296      | SVA chr6:32514612<br>(len:1267 maf:0.11786)    | 0.30                            | Arteriolosclerosis                       | 9.51E-02                                   |
| chr6:32075406-33083813<br>(HLA-DRB5-) | DEL_25764    | DEL chr6:32615970<br>(len:-4223 maf:0.304702)  | 0.29                            | Beta-Amyloid                             | 1.42E-01                                   |
| chr6:32075406-33083813<br>(HLA-DRB5-) | DEL_25705    | DEL chr6:32450599<br>(len:-86768 maf:0.310127) | 0.28                            | Cognitive resilience                     | 6.13E-03                                   |

|                                         |           |                                                 |      |                                 |          |
|-----------------------------------------|-----------|-------------------------------------------------|------|---------------------------------|----------|
| chr6:32075406-33083813<br>(HLA-DRB5-)   | INS_5722  | INS chr6:32664240 (len:57<br>maf:0.113472)      | 0.28 | Frailty                         | 7.59E-02 |
| chr6:32075406-33083813<br>(HLA-DRB5-)   | ALU_3719  | ALU chr6:32449295<br>(len:280 maf:0.327758)     | 0.27 | Motor functions                 | 5.01E-02 |
| chr6:32075406-33083813<br>(HLA-DRB5-)   | DEL_25748 | DEL chr6:32516620<br>(len:-24772 maf:0.242315)  | 0.27 | Tangle density                  | 2.91E-02 |
| chr6:32075406-33083813<br>(HLA-DRB5-)   | DUP_4025  | DUP chr6:32488856<br>(len:35679 maf:0.26085)    | 0.25 | Neurofibrillary<br>tangle       | 1.20E-01 |
| chr6:32075406-33083813<br>(HLA-DRB5-)   | DEL_25716 | DEL chr6:32455073<br>(len:-23356 maf:0.279292)  | 0.23 | Frailty                         | 1.42E-01 |
| chr6:32075406-33083813<br>(HLA-DRB5-)   | DEL_25695 | DEL chr6:32416934<br>(len:-105 maf:0.427667)    | 0.23 | Major Depressive<br>Disorder    | 1.69E-02 |
| chr6:46931284-48052180<br>(CD2AP)       | DEL_25938 | DEL chr6:47564729<br>(len:-2187 maf:0.0691682)  | 0.22 | Mild cognitive<br>impairment    | 8.86E-02 |
| chr7:11768758-12769593<br>(TMEM106B)    | DEL_27662 | DEL chr7:12281711<br>(len:-343 maf:0.424955)    | 0.96 | Tangle density                  | 7.72E-04 |
| chr10:123672912-12467291<br>2 (PLEKHA1) | DEL_3676  | DEL chr10:124216821<br>(len:-461 maf:0.230561)  | 0.23 | Global<br>parkinsonian score    | 1.16E-02 |
| chr11:46880340-48057871<br>(CELF1)      | DEL_4449  | DEL chr11:47887667<br>(len:-535 maf:0.443942)   | 0.56 | Cerebral<br>Infarctions (Micro) | 1.19E-02 |
| chr11:46880340-48057871<br>(CELF1)      | ALU_6357  | ALU chr11:47806655<br>(len:280 maf:0.347197)    | 0.39 | Cerebral<br>Atherosclerosis     | 6.04E-02 |
| chr11:46880340-48057871<br>(CELF1)      | DEL_4444  | DEL chr11:47563238<br>(len:-96 maf:0.368897)    | 0.39 | Mild cognitive<br>impairment    | 4.43E-02 |
| chr12:113219788-11421978<br>8 (TPCN1)   | INS_11268 | INS chr12:113724222<br>(len:69 maf:0.0384268)   | 0.67 | Lewy Body disease               | 4.35E-02 |
| chr14:52798853-53900629<br>(FERMT2)     | INV_1034  | INV chr14:53274515<br>(len:179 maf:0.084991)    | 0.41 | Cerebral<br>Atherosclerosis     | 1.28E-02 |
| chr15:58522615-59557023<br>(ADAM10)     | DEL_9672  | DEL chr15:58912865<br>(len:-329 maf:0.344033)   | 0.39 | Global<br>parkinsonian score    | 1.31E-01 |
| chr16:19308163-20308163<br>(IQCK)       | DEL_10481 | DEL chr16:19945550<br>(len:-22029 maf:0.142405) | 0.44 | Major Depressive<br>Disorder    | 2.34E-03 |
| chr17:17559454-18559454<br>(MYO15A)     | DEL_11664 | DEL chr17:18270187<br>(len:-1505 maf:0.0863472) | 0.37 | TDP-43                          | 7.02E-03 |

| AD GWAS -log10(P-value)            | Number of SVs in the locus | SV in LD with GWAS SNP (R2) | SV-xQTL (number of phenotypes) | SVs associated with AD/DRD phenotypes<br>P-value < 0.005 (FDR/MAP) |
|------------------------------------|----------------------------|-----------------------------|--------------------------------|--------------------------------------------------------------------|
| chr1:485377-1485377 (AGRN)         | 7.4                        | 21                          | 2                              | 3                                                                  |
| chr1:109388432-110388432 (SORT1)   | 8.1                        | 7                           | 1                              | 3                                                                  |
| r1:160655392-161655392 (ADAMTS4)   | 9.7                        | 5                           | 1                              | 1                                                                  |
| chr1:207192049-208302552 (CR1)     | 23.2                       | 6                           |                                | 1                                                                  |
| chr2:9199011-10199011 (ADAM17)     | 7.6                        | 11                          |                                | 1                                                                  |
| chr2:37031939-38031939 (PRKD3)     | 8.5                        | 3                           |                                |                                                                    |
| chr2:105735428-106866056 (NCK2)    | 12.7                       | 12                          | 3                              |                                                                    |
| chr2:127391427-128392810 (BIN1)    | 43.2                       | 4                           |                                | 1                                                                  |
| chr2:203243439-204243439 (WDR12)   | 8                          | 3                           |                                | 2                                                                  |
| chr2:233481912-234582577 (INPP5D)  | 7.5                        | 15                          |                                | 1                                                                  |
| chr3:56726150-57726150 (HESX1)     | 7.9                        | 5                           |                                | 1                                                                  |
| chr3:154287511-155301978 (MME)     | 10.7                       | 5                           | 1                              |                                                                    |
| chr4:487343-1487343 (DUA)          | 11.1                       | 32                          | 2                              | 1                                                                  |
| chr4:10514822-11526028 (CLNK)      | 16.7                       | 7                           |                                |                                                                    |
| chr4:39698846-40698846 (RHOF)      | 8.9                        | 8                           |                                |                                                                    |
| chr5:14224413-15224413 (ANKH)      | 8.6                        | 6                           | 1                              | 1                                                                  |
| chr5:85723195-86723195 (COX7C)     | 14.9                       | 9                           |                                |                                                                    |
| chr5:87723420-88723420 (MEF2C)     | 7.5                        | 3                           |                                |                                                                    |
| chr5:149932388-150932388 (TNIP1)   | 8.9                        | 4                           |                                | 1                                                                  |
| chr5:156026331-157026331 (HAVCR2)  | 9.1                        | 2                           |                                |                                                                    |
| 5:179128150-180128150 (RASGEF1C)   | 15.7                       | 9                           |                                | 1                                                                  |
| chr6:32075406-33083813 (HLA-DQA1)  | 11.5                       | 75                          | 0.91                           | 3                                                                  |
| chr6:40442196-41654650 (TREM2)     | 36.6                       | 12                          |                                | 1                                                                  |
| chr6:46931284-48052180 (CD2AP)     | 10.3                       | 6                           | 0.22                           | 1                                                                  |
| chr6:114112895-115112895 (HS3ST5)  | 8.6                        | 3                           |                                |                                                                    |
| chr7:7356894-8744012 (CA1)         | 8.2                        | 9                           |                                | 1                                                                  |
| chr7:11768758-12769593 (TMEM106B)  | 8.6                        | 11                          | 0.96                           | 2                                                                  |
| chr7:27668746-28668746 (JAZF1)     | 8                          | 2                           |                                |                                                                    |
| chr7:37341534-38383793 (EPDR1)     | 9.3                        | 9                           |                                | 1                                                                  |
| chr7:54441328-55441328 (SEC61G)    | 9.8                        | 13                          |                                | 1                                                                  |
| chr7:99432049-100591795 (SPDY3)    | 15                         | 8                           |                                | 2                                                                  |
| chr7:142599133-143610762 (EPHA1)   | 10.3                       | 4                           |                                | 1                                                                  |
| r7:145450029-146450029 (CNTNAP2)   | 8.7                        | 6                           |                                |                                                                    |
| chr8:11202122-12202122 (CTSB)      | 8.7                        | 4                           |                                | 2                                                                  |
| chr8:26695121-27967686 (PTK2B)     | 13.1                       | 11                          |                                | 1                                                                  |
| hr8:144608151-145658607 (SHARPIN)  | 15.8                       | 17                          |                                | 3                                                                  |
| chr9:107165978-108165978 (ABCA1)   | 8.8                        | 10                          |                                | 1                                                                  |
| chr10:11217397-12223008 (ECHDC3)   | 10.7                       | 7                           |                                | 3                                                                  |
| chr10:61238152-62284928 (ANK3)     | 7.4                        | 4                           |                                |                                                                    |
| chr10:81753984-82753984 (TSPAN14)  | 18.7                       | 4                           |                                |                                                                    |
| chr10:97526407-98526407 (BLNK)     | 10.2                       | 6                           |                                | 2                                                                  |
| r10:123672912-124672912 (PLEKHA1)  | 8.6                        | 3                           | 0.23                           | 1                                                                  |
| chr11:46880340-48057871 (CELF1)    | 8                          | 9                           | 0.56                           | 1                                                                  |
| chr11:59423508-60521948 (MS4A4A)   | 32.5                       | 7                           |                                |                                                                    |
| chr11:85276544-86368640 (PICCALM)  | 25.9                       | 9                           |                                | 2                                                                  |
| chr11:120853077-121935587 (SORL1)  | 10.6                       | 5                           |                                | 1                                                                  |
| chr12:113219788-114219788 (TPCN1)  | 8.7                        | 8                           | 0.67                           | 1                                                                  |
| chr14:52798853-53900629 (FERMT2)   | 8.9                        | 6                           | 0.41                           | 2                                                                  |
| chr14:92426952-93438855 (SLC24A4)  | 7.3                        | 2                           |                                | 1                                                                  |
| r14:105728095-107621607 (TMEM121)  | 7.7                        | 35                          |                                | 3                                                                  |
| chr15:50494011-51501534 (SPPL2A)   | 7.9                        | 9                           |                                | 3                                                                  |
| chr15:58522615-59557023 (MINDY2)   | 14.2                       | 4                           | 0.39                           | 2                                                                  |
| chr15:63069902-64923506 (APH1B)    | 24.7                       | 6                           |                                | 1                                                                  |
| chr15:78729199-79729199 (CTSH)     | 8.4                        | 5                           |                                | 1                                                                  |
| chr16:19308163-20308163 (IQCK)     | 7.6                        | 9                           | 0.44                           | 2                                                                  |
| chr16:29521402-30521402 (DOC2A)    | 12.6                       | 2                           |                                | 1                                                                  |
| chr16:30622571-31633100 (KAT8)     | 7.4                        | 4                           |                                | 1                                                                  |
| chr16:70194000-71194000 (IL34)     | 7.4                        | 2                           |                                | 4                                                                  |
| chr16:78855857-80108408 (WWOX)     | 7.4                        | 5                           |                                | 1                                                                  |
| chr16:81273003-82442028 (PLCG2)    | 12.9                       | 11                          |                                | 1                                                                  |
| chr16:85954210-86954210 (FOXF1)    | 7.9                        | 15                          |                                | 4                                                                  |
| chr16:89670095-90670095 (PRDM7)    | 14.2                       | 15                          |                                | 2                                                                  |
| chr17:1131341-2131341 (WDR81)      | 10.1                       | 17                          |                                | 2                                                                  |
| chr17:4469940-5638990 (SCIMP)      | 11.2                       | 17                          |                                | 2                                                                  |
| chr17:17559454-18559454 (MYO15A)   | 9                          | 6                           | 0.37                           | 1                                                                  |
| chr17:41930244-42942344 (GRN)      | 19.6                       | 1                           |                                | 1                                                                  |
| chr17:44356641-45356641 (WNT3)     | 12                         | 3                           |                                | 1                                                                  |
| chr17:46797297-47950775 (AB13)     | 13.6                       | 8                           |                                |                                                                    |
| chr17:55909089-56910041 (TSPOAP1)  | 9.1                        | 3                           |                                | 1                                                                  |
| chr17:61038148-62048918 (CYB561)   | 8.3                        | 4                           |                                | 1                                                                  |
| chr18:55689459-56689459 (ALPK2)    | 7.5                        | 5                           |                                | 1                                                                  |
| chr19:539323-2354258 (ABCA7)       | 15.5                       | 47                          |                                | 3                                                                  |
| chr19:44851516-4674841 (APOE)      | 300                        | 16                          |                                | 2                                                                  |
| chr19:48713504-49713504 (MAMSTR)   | 7.8                        | 13                          |                                | 2                                                                  |
| chr19:49953317-50953317 (SIGLEC11) | 8.3                        | 7                           |                                | 2                                                                  |
| chr19:51227962-52237991 (CD33)     | 9.7                        | 10                          |                                |                                                                    |
| chr19:54271451-55325174 (LILRB2)   | 10.4                       | 18                          |                                | 3                                                                  |
| chr20:1-893978 (RBCK1)             | 7.8                        | 7                           |                                | 1                                                                  |
| chr20:54483075-55518260 (CASS4)    | 15.2                       | 6                           |                                | 1                                                                  |
| r20:61874441-62874441 (SLC2A4RG)   | 8.6                        | 29                          |                                | 2                                                                  |
| chr21:26769932-28658856 (APP)      | 9.1                        | 10                          |                                | 1                                                                  |

### Supplementary Figure S1. Overview of SVs in 81 AD GWAS loci.

Heatmap shows for each of the AD loci (row): 1) the strength of the association in the GWAS study; 2) the number of SVs in the region; 3) the strength of LD between the lead GWAS SNP and an SV (highest R2); 4) the number of AD/DRD phenotypes associated in the SV-GWAS tests; 5) the number of molecular phenotypes linked to an SV found in each locus (SV-xQTL).
